# Supplementary material
Source: PubMed Central journal article supplement (PMC4482345)

# Supplemental Figure 1

PEG-DA  
Microfabricated  
Channels

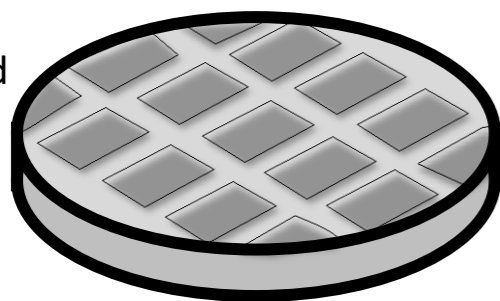

Matrigel coating for  
24 hours, 4°C

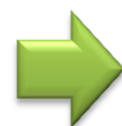

1 hr gelation, 37°C

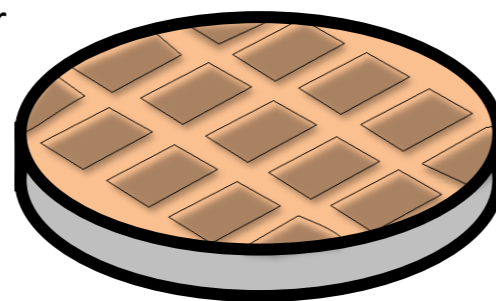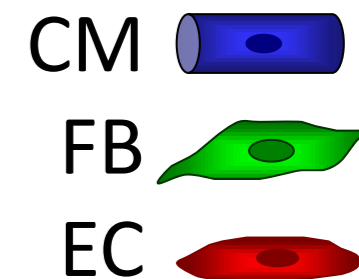

## A) Sequential Preculture organoids

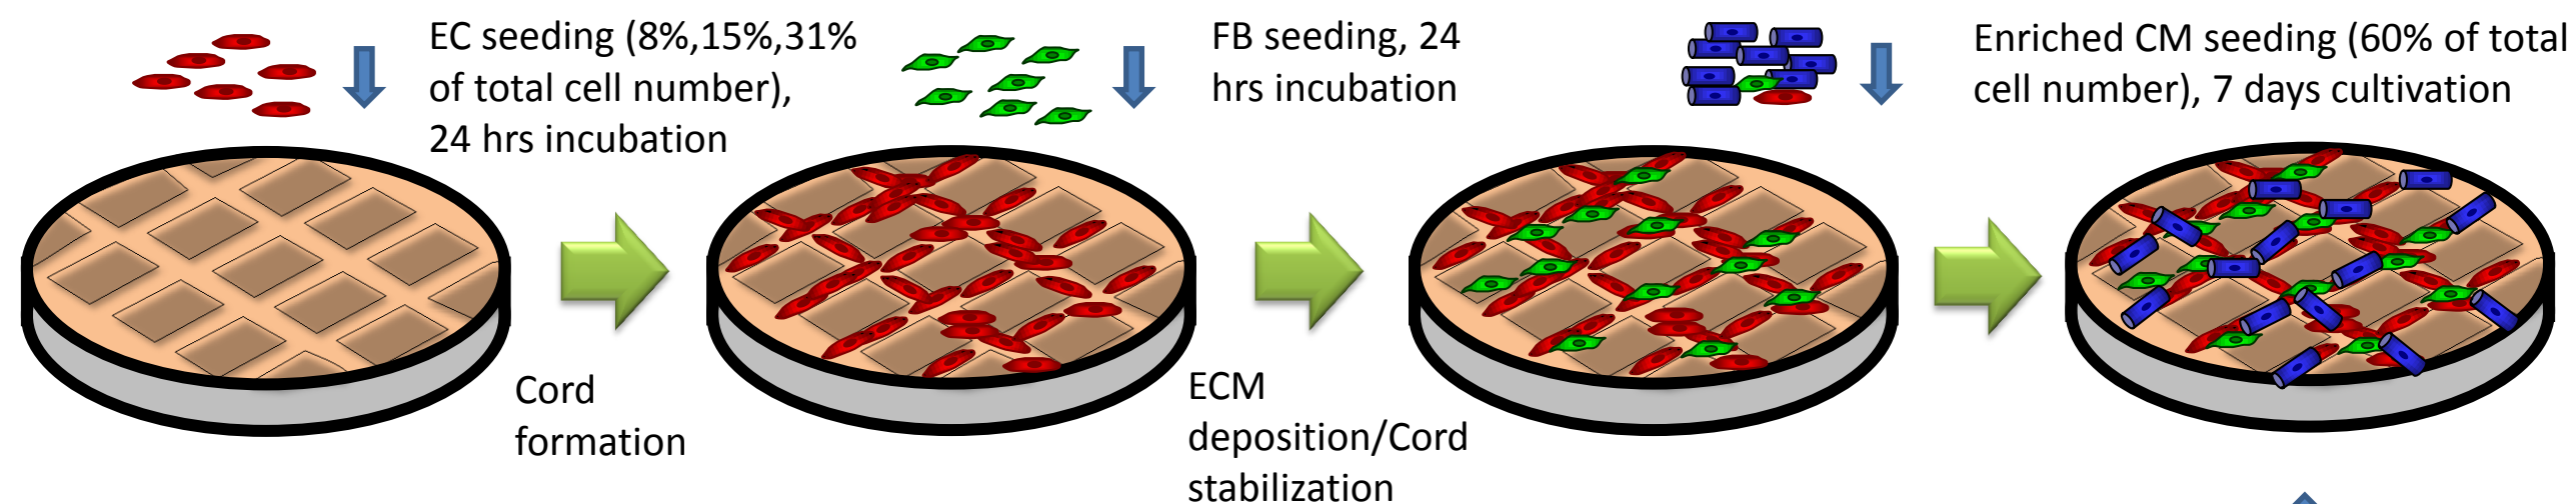

## B) Enriched CM organoids

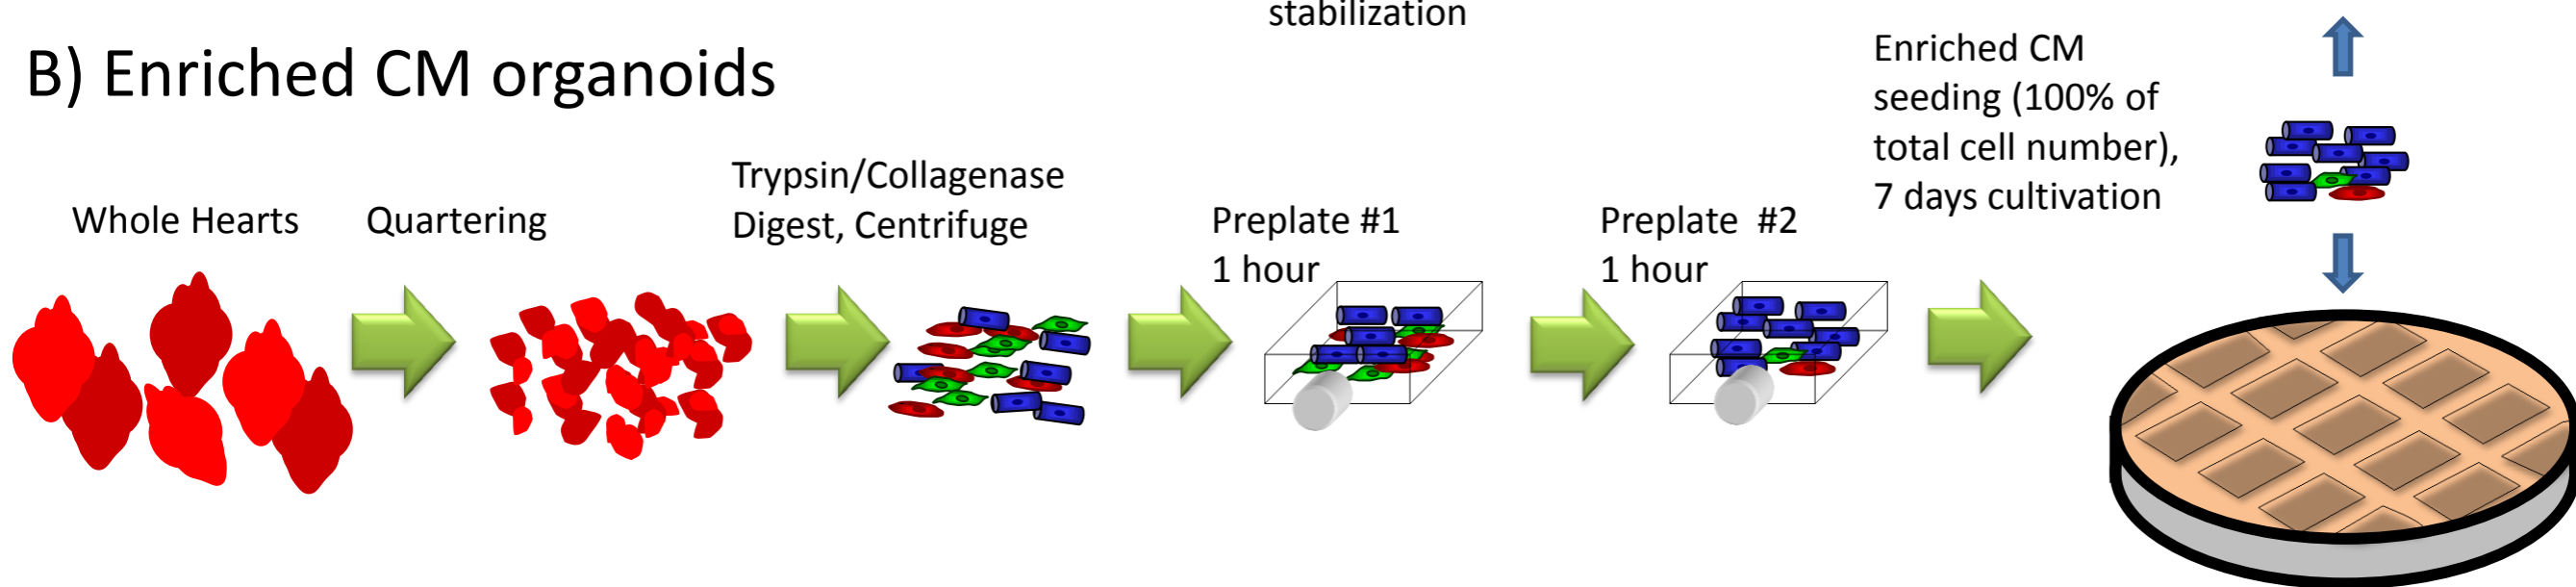

## C) Whole Heart Isolate

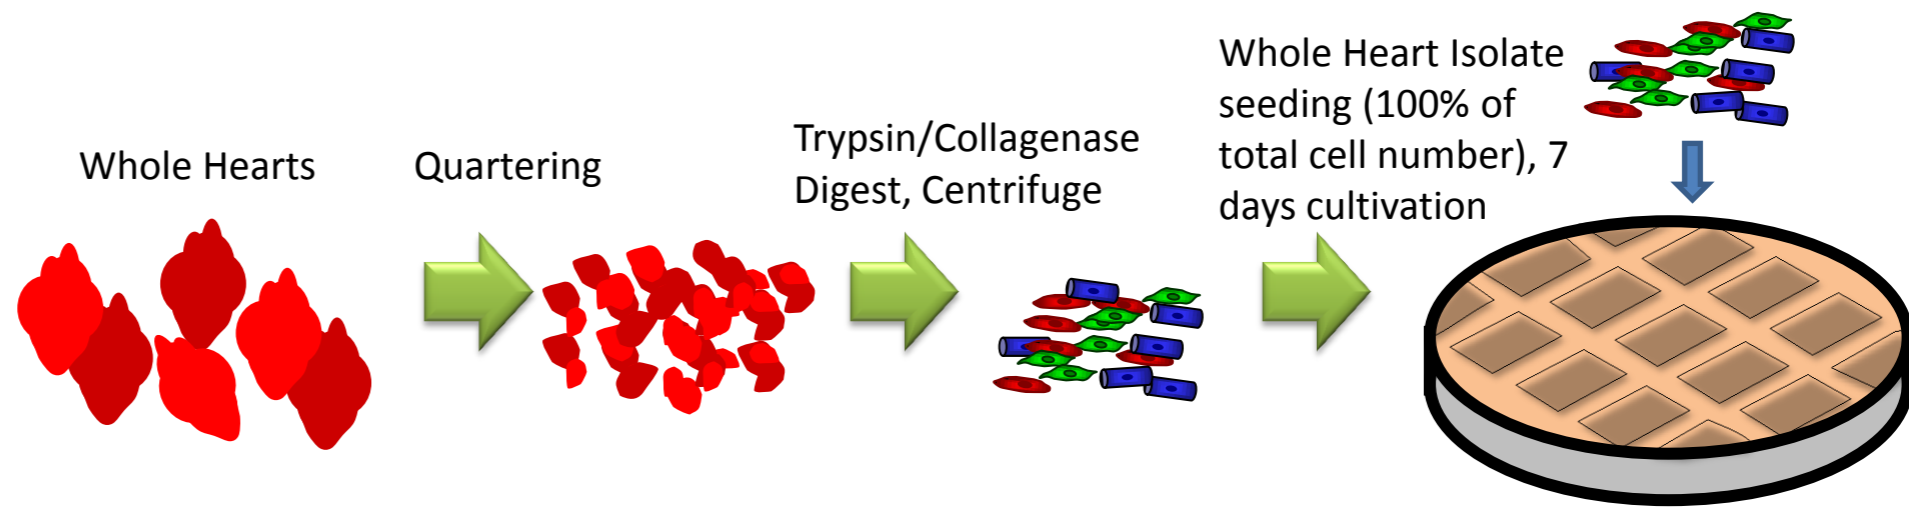

Supplement: NIHMS701236-supplement-Figure_S1.pdf [file NIHMS701236-supplement-Figure_S1.pdf]
